# Supplementary material
Source: MDPI journal article supplement (https://www.mdpi.com/2297-8739/10/5/287)

**Geographical Origin Authentication of Edible *Chrysanthemum morifolium* Ramat.  
(Hangbaiju) Using Stable Isotopes**

Hanyi Mei <sup>a, 1</sup>, Jing Nie <sup>a, 1</sup>, Shu Wang <sup>b</sup>, Yongzhi Zhang <sup>a</sup>, Chunlin Li <sup>a</sup>, Shengzhi Shao <sup>a</sup>, Shanshan  
Shao <sup>b</sup>, Karyne M. Rogers <sup>a, c</sup>, Yuwei Yuan <sup>a \*</sup>

<sup>a</sup> Institute of Agro-Products Safety and Nutrition, Zhejiang Academy of Agricultural Sciences, Key  
Laboratory of Information Traceability for Agricultural Products, Ministry of Agriculture and Rural  
Affairs of China, Hangzhou 310021, China

<sup>b</sup> Zhejiang Longevity Valley Botanical Co. Ltd., 12 Huanglong 3rd Road, Jinhua, Zhejiang, 321200,  
China

<sup>c</sup> National Isotope Centre, GNS Science, Lower Hutt 5040, New Zealand

<sup>1</sup> These authors contributed equally to this article.

\* Address for correspondence:

<sup>a</sup> Institute of Agro-Products Safety and Nutrition, Zhejiang Academy of Agricultural Sciences, 198  
Shiqiao Road, Shangcheng District, Hangzhou 310021, Zhejiang Province, China.

E-mails: Yuwei Yuan, [yuanyw@zaas.ac.cn](mailto:yuanyw@zaas.ac.cn)

22 **Supplementary materials**

23

24 **Table S1.** Principal component eigenvalues and variance contribution rates of four indexes of  
25 different regions of Hangbaiju

| Principal Component Number | Eigenvalue $\lambda$ | Percentage of Variance (%) | Cumulative (%) |
|----------------------------|----------------------|----------------------------|----------------|
| 1                          | 2.796                | 69.9                       | 69.9           |
| 2                          | 0.755                | 18.9                       | 88.8           |
| 3                          | 0.313                | 7.8                        | 96.6           |
| 4                          | 0.136                | 3.4                        | 100.0          |

26

**Figure S1.** Variation characteristics of (a)  $\delta^{13}\text{C}$  and  $\delta^{15}\text{N}$ , (b)  $\delta^2\text{H}$  and  $\delta^{18}\text{O}$ , (c) %C and %N in Zao Hangbaiju samples at different growth stages. The stages 1 to 10 represent (1) seedling, (2) layering, (3) first pinching, (4) second pinching, (5) flower bud stage (stem and leaf only), (6) flower bud, (7) early blooming flower stage (stem and leaf only), (8) early blooming flower (9) mid blooming flower stage (stem and leaf only) and (10) mid blooming flower. Data from each stage represent the mean of three samples with standard errors. Fertilization occurs between Stages 4 and 5 (before pink dotted line). Stages 5 to 6 represents the flower bud stage (between pink to yellow dotted lines), Stages 7 to 8 represents the early blooming flower stage (between yellow to blue dotted lines), and Stages 9 to 10 represents the mid-blooming flower stage (after blue dotted line).

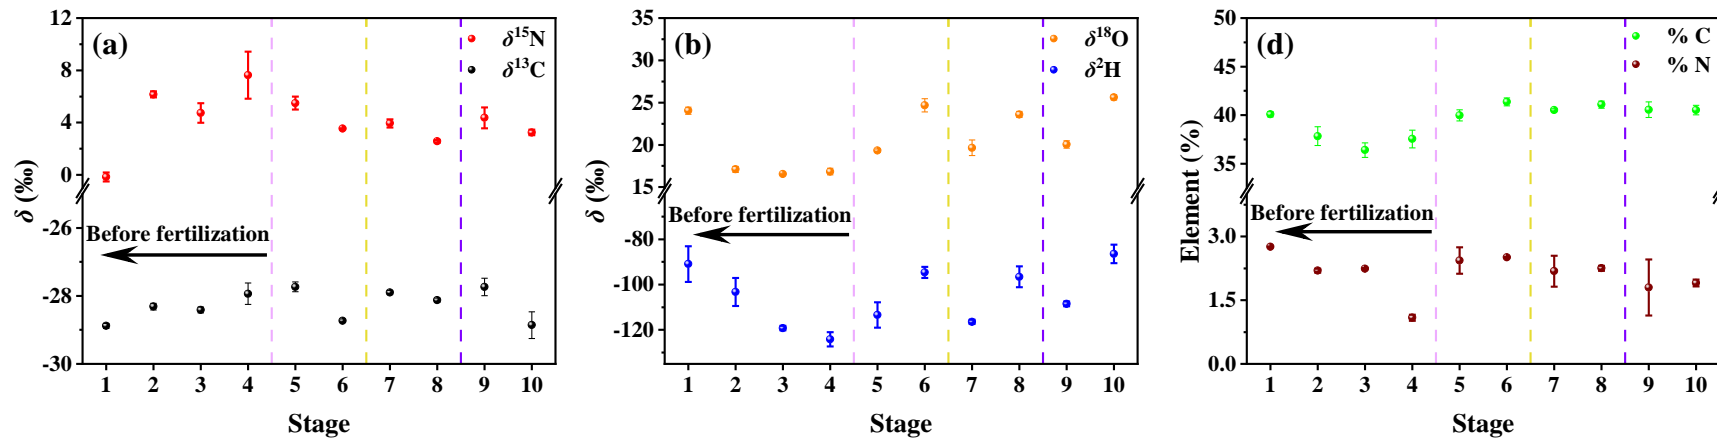



**Figure S3.** Variation characteristics of (a)  $\delta^{13}\text{C}$  and  $\delta^{15}\text{N}$ , (b)  $\delta^2\text{H}$  and  $\delta^{18}\text{O}$ , (c) %C and %N in Shou2 Hangbaiju samples at different growth stages. The stages 1 to 10 represent (1) seedling, (2) layering, (3) first pinching, (4) second pinching, (5) flower bud stage (stem and leaf only), (6) flower bud, (7) early blooming flower stage (stem and leaf only), (8) early blooming flower (9) mid blooming flower stage (stem and leaf only) and (10) mid blooming flower. Data from each stage represent the mean of three samples with standard errors. Fertilization occurs between Stages 4 and 5 (before pink dotted line). Stages 5 to 6 represents the flower bud stage (between pink to yellow dotted lines), Stages 7 to 8 represents the early blooming flower stage (between yellow to blue dotted lines), and Stages 9 to 10 represents the mid-blooming flower stage (after blue dotted line).

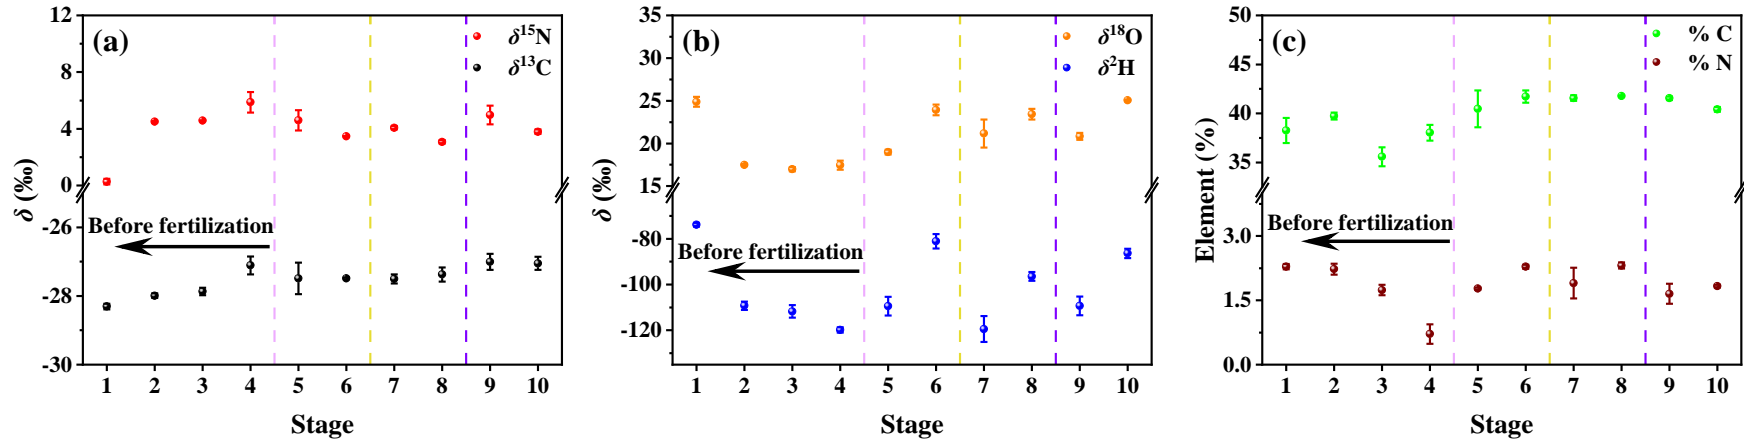

Supplement: s1 [file s1 › separations-2312910-supplementary.pdf]
